# Supplementary material for: A permissive chromatin structure is adopted prior to site-specific DNA demethylation of developmentally expressed genes involved in macronuclear differentiation
Source: PubMed Central journal article supplement (PMC3608066; doi:10.1186/1756-8935-6-5), 2013-03-05
Supplement: 1756-8935-6-5-S1.pdf [file 1756-8935-6-5-S1.pdf]

## Additional files

### Additional file 1 – 5meC quantification in *mdp1* and *mpd2*

#### *mdp1* nanochromosome

##### *Vegetative*

- 18 sequences total, all sequences contain methylated cytosines.
- 73% of all 5'-cytosines are methylated.
- 5x 1 cytosine methylated=28%; 9x 2 cytosines methylated=50%; 4x 3 cytosines methylated=22%.
- 1<sup>st</sup> position cytosine methylated=56%; 2<sup>nd</sup> position cytosine methylated=72%; 3<sup>rd</sup> position cytosine methylated=67% .

##### *Exconjugant*

- 18 sequences total, 78% contain no methylated cytosine.
- 4 sequences (22%) contain a single methylated cytosine at 1<sup>st</sup> or second position.

##### *Exconjugant HAT inhibitor C646*

- 16 sequences total, all sequences contain methylated cytosines.
- 46% of all 5'-cytosines methylated.
- 12x 1 cytosine methylated=75%; 2x 2 cytosines methylated=13%; 2x 3 cytosines methylated=13%.
- 1<sup>st</sup> position cytosine methylated=56%; 2<sup>nd</sup> position cytosine methylated=19%; 3<sup>rd</sup> position cytosine methylated=63% .

##### *Exconjugant HDAC inhibitor TSA*

- 8 seqs; no methylated cytosines found.

***mdp2* nanochromosome**

*Vegetative*

- 19 sequences total, 63% of all sequences contain a single methylated cytosine, whereas no cytosine methylation could be detected in the remaining sequences.

*Exconjugant*

- 15 sequences total, no cytosine methylation could be detected in 93% of all sequences.

*Exconjugant HAT inhibitor C646*

- 8 sequences total, 88% of all sequences contain a single methylated cytosine.

*Exconjugant HDAC inhibitor TSA*

- 8 seqs; no methylated cytosines found.
