# Supplementary material for: A permissive chromatin structure is adopted prior to site-specific DNA demethylation of developmentally expressed genes involved in macronuclear differentiation
Source: PubMed Central journal article supplement (PMC3608066; doi:10.1186/1756-8935-6-5), 2013-03-05

**Additional file 2 – DNA methylation patterns of *A. mdp1*, *B. mdp2* and *C. alpha-tubulin* in differentiating macronuclei (anlagen).** In each cartoon the first line is the bisulfite-untreated original sequence, which in these samples was not excluded from the consensus sequence illustration (on top).

**A.**

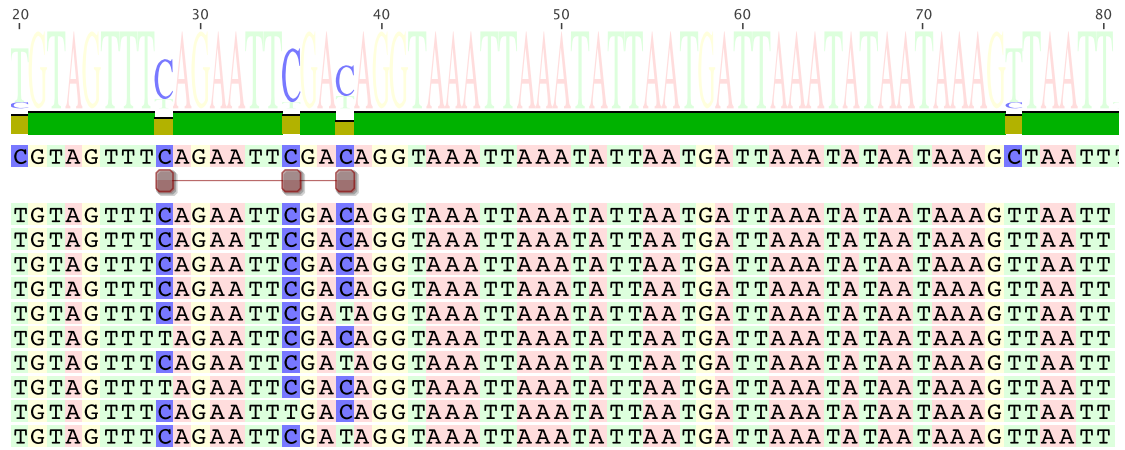

**B.**

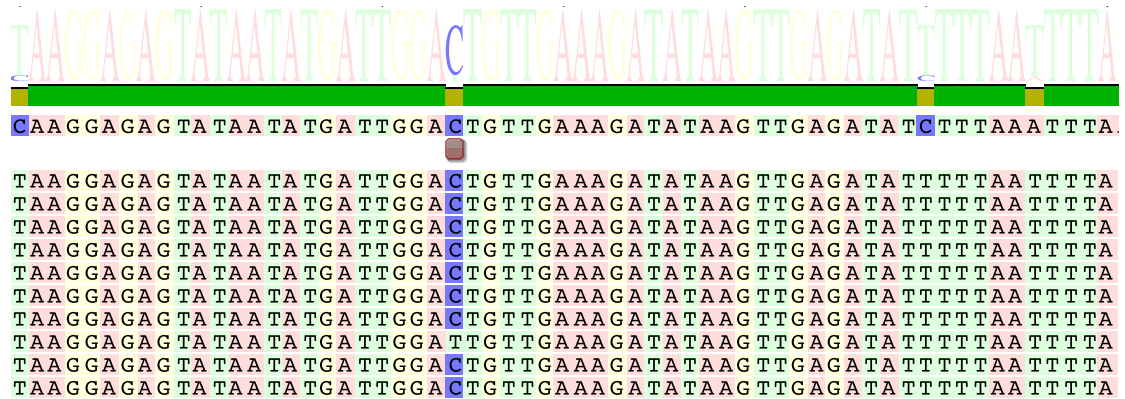

**C.**

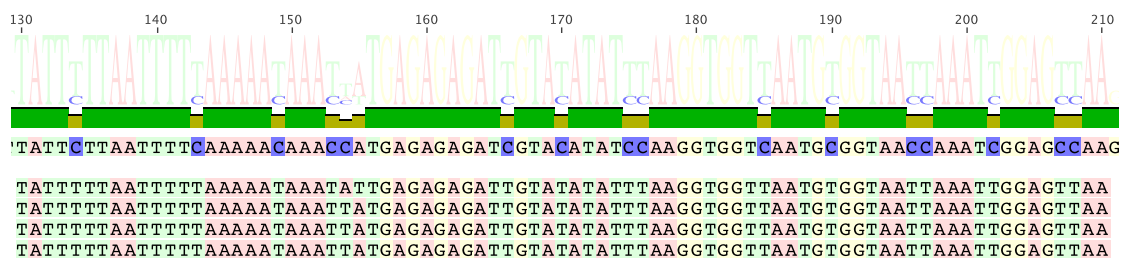

Supplement: 1756-8935-6-5-S2.pdf [file 1756-8935-6-5-S2.pdf]
