# Supplementary material for: A permissive chromatin structure is adopted prior to site-specific DNA demethylation of developmentally expressed genes involved in macronuclear differentiation
Source: PubMed Central journal article supplement (PMC3608066; doi:10.1186/1756-8935-6-5), 2013-03-05

**Additional file 3 – Effect of C646 on the distribution of H3K9ac/K14ac on A. *mdp1* and B. *mdp2***

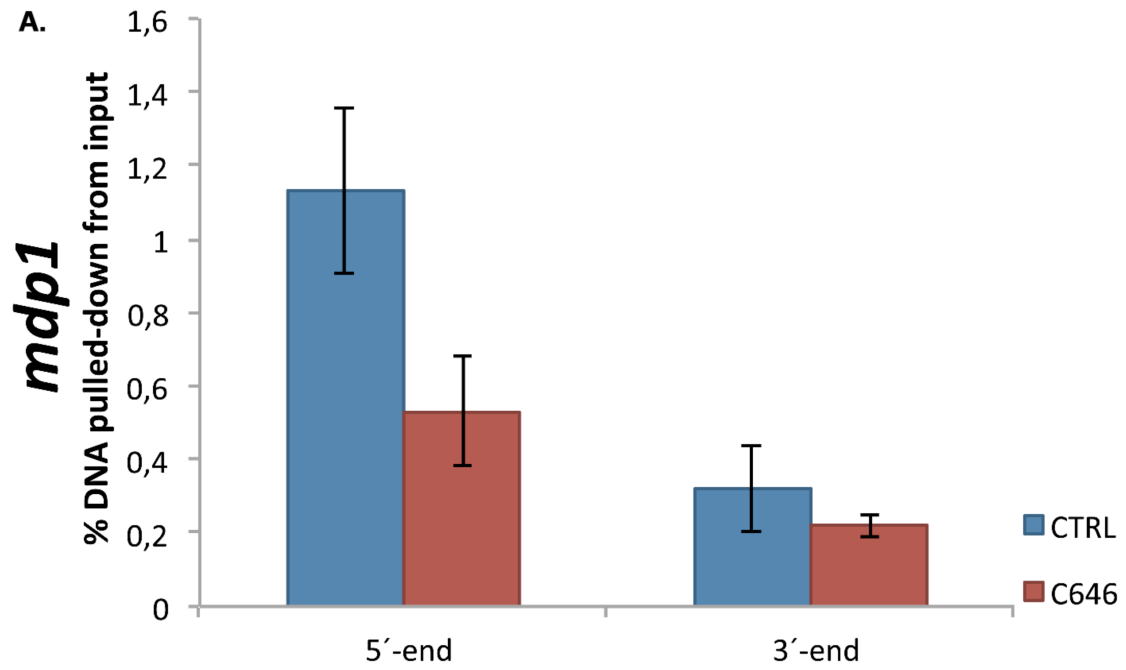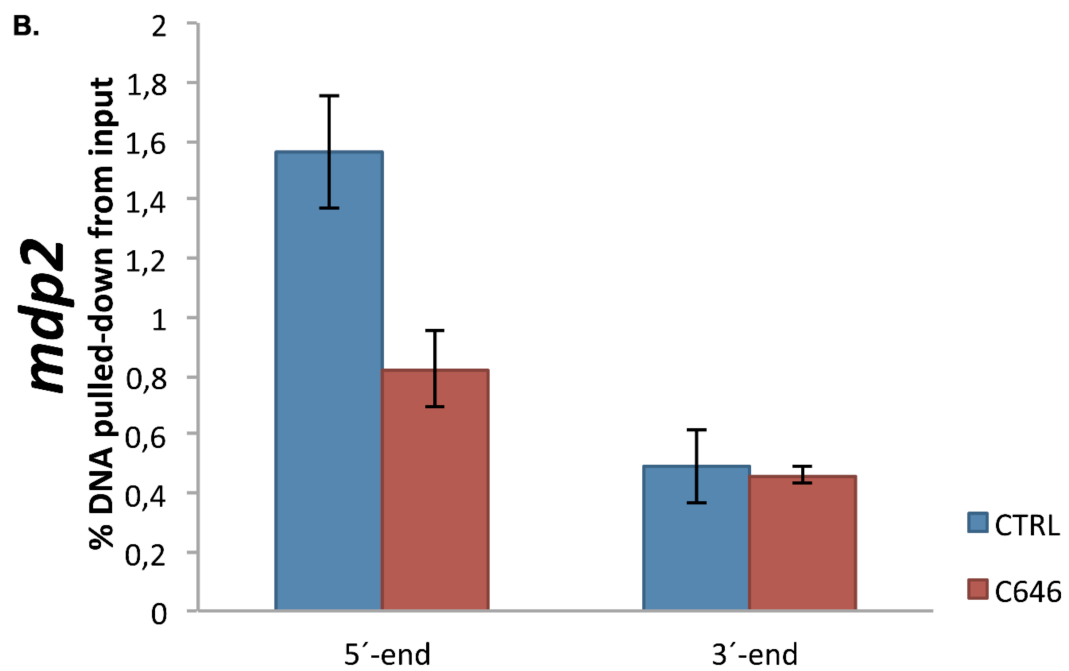

Supplement: 1756-8935-6-5-S3.pdf [file 1756-8935-6-5-S3.pdf]
